# Supplementary material for: A solvent-controlled photoresponsive ionic hydrogen-bonded organic framework for encryption applications
Source: Royal Society of Chemistry journal article supplement (doi:10.1039/d4cc00701h), 2024-01-01
Supplement: d4cc00701h1.pdf [file d4cc00701h1.pdf]

*Electronic Supplementary Information for:*

**A solvent-controlled photoresponsive ionic hydrogen-bonded  
organic framework for encryption applications**

Ming-Feng Huang,<sup>a</sup> Li-Hui Cao,<sup>\*a</sup> Bin Zhou<sup>a</sup>

<sup>a</sup>Shaanxi Key Laboratory of Chemical Additives for Industry, College of  
Chemistry and Chemical Engineering, Shaanxi University of Science and  
Technology, Xi'an, 710021, China

\*E-mail: caolihui@sust.edu.cn

## Experimental section

### Materials and reagents.

All reagents and solvents, including Tetraphenylethylene (TPE), terephthalimidine dihydrochloride (PAM·2HCl), [1,1'-biphenyl]-4,4'-bis(carboximidamide) dihydrochloride (BPAM·2HCl), polyvinyl alcohol (PVA), concentrated sulfuric acid, ethyl acetate and N, N-dimethylacetamide (DMA) were obtained from the commercial companies and used without further purification. Deionized water was used throughout all experiments wherever is needed.

### Characterization.

Thermogravimetric analysis (TGA) measurements were performed on a TGA-55 instrument from 25 °C to 800 °C at a heating rate of 10 °C/min under N<sub>2</sub> atmosphere. Powder X-ray diffraction (PXRD) measurements were carried out in Bruker D8 Advance with a Cu X-ray source over a range of  $2\theta = 3.0\sim 50.0^\circ$ . The solid-state UV-vis spectra were obtained from a Cary 5000 spectrophotometer. Fluorescence spectra were recorded on an Edinburgh FLS-1000 fluorescence spectrometer. The solid-state EPR spectra were recorded at ambient temperature with a Bruker A300 Electron Spin Resonance Spectrometer. X-ray photoelectron spectroscopy (XPS) was obtained by ESCALAB 250 X-ray photoelectron spectrometer and the C 1s peak at 284.8 eV as internal standard.

### Single-Crystal X-ray Diffraction.

Single-crystal X-ray diffraction data for compounds **iHOF-17** and **iHOF-18** were collected on a Bruker SMART APEX CCD diffractometer equipped with a graphite-monochromated Cu K $\alpha$  radiation ( $\lambda = 1.54184 \text{ \AA}$ ) using the  $\omega$ -scan technique. Using Olex2,<sup>1</sup> the structure was solved with the ShelXT<sup>2</sup> structure solution program using Intrinsic Phasing and refined with the ShelXL<sup>3</sup> refinement package using Least Squares minimization. The diffused electron densities resulting from these solvent molecules were removed using the SQUEEZE<sup>4</sup> routine of PLATON; structures were then refined

again using the data generated. The contents of the solvent region are not represented in the unit cell contents in the crystal data. All nonhydrogen atoms were refined with anisotropic displacement parameters. Crystal data collection and structure refinement details are summarized in Table S1. More details on the crystallographic studies as well as atomic displacement parameters are given in Supporting Crystallographic Data as CIF files.

### **Synthesis of ligand (H<sub>4</sub>TPE).**

Tetrakis(4-sulfophenyl)ethylene (H<sub>4</sub>TPE) was synthesized using reported literature procedure. To concentrated H<sub>2</sub>SO<sub>4</sub> (10 mL) heated at 115 °C was added tetraphenylethylene (0.51 g, 1.5 mmol) and the solution was stirred for 4 h at 115 °C. To ethyl acetate at 0 °C was very slowly added dropwise the reaction mixture. The resulting precipitate was filtered and dried at 80°C to give H<sub>4</sub>TPE (0.89 g, yield 90 %) as a gray solid.<sup>5</sup>

### **Preparation of iHOF-17.**

Water (3 mL) was added to completely dissolve H<sub>4</sub>TPE (13.06 mg, 0.02 mmol), and PAM·2HCl (9.4 mg, 0.04 mmol) was dissolved in water (2 mL) to obtain a clarified solution. Then, the two clarified solutions were mixed and placed in a hydrothermal reactor. After sealing, the hydrothermal reactor was placed in an oven at 70 °C for 2 days, and colorless flaky crystals were obtained after natural cooling of the solution. The yield was 63%.

### **Preparation of iHOF-18.**

DMA (2 mL) was added to completely dissolve H<sub>4</sub>TPE (13.06 mg, 0.02 mmol), and BPAM·2HCl (12.44 mg, 0.04 mmol) was dissolved with DMA (2 mL) and water (1 mL) to obtain a clarified solution. Then, the two clarified solutions were mixed and placed in a hydrothermal reactor. After sealing, the hydrothermal reactor was placed in an oven at 100 °C for 3 days, and the reaction solution was filtered after natural cooling. The filtrate was placed in an oven at 55 °C and colorless flaky crystals were obtained after 4 days. The yield was 58 %.

### **Preparation of 10%-iHOF-18-PVA Composite Membrane.**

The **iHOF-18** (20 mg) was ground and added to 2 mL of water. The mixture was stirred for 6 h to obtain a well-dispersed suspension. Next, a dispersion of 10 wt % PVA (0.2 g) in 4 mL of water was added to the suspension and stirred continuously for 6 h at room temperature to obtain a homogeneous solution. The resulting mixed solution was poured onto a glass mold and dried at room temperature for 48 h to remove the solvent, resulting in a **10%-iHOF-18-PVA** composite membrane.

## Supporting Figures

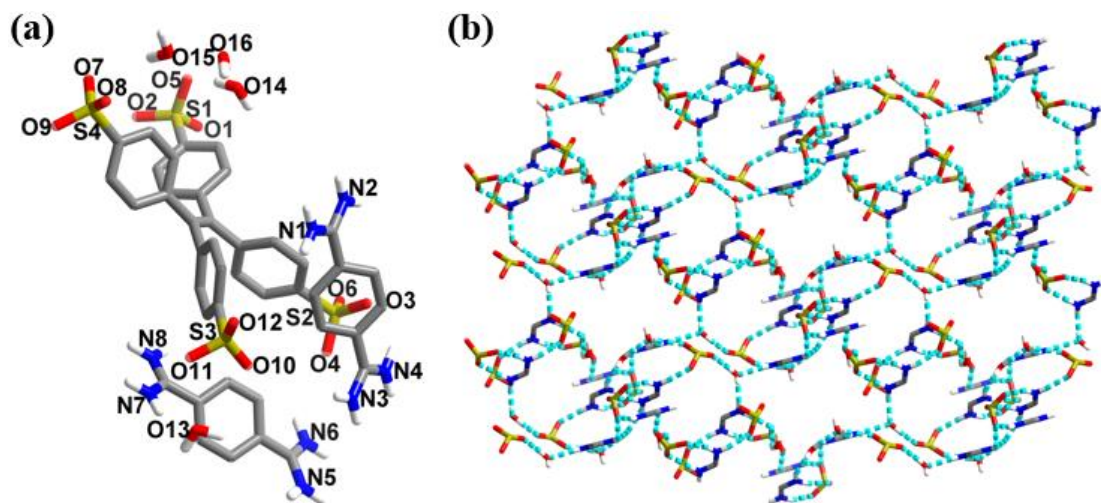

**Fig. S1.** (a) The asymmetric unit of **iHOF-17**. (b) The 2D hydrogen bond network diagram of **iHOF-17**.

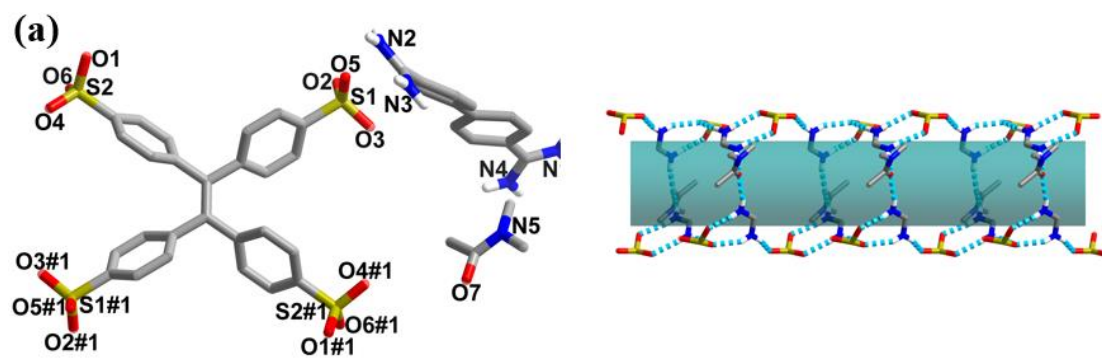

**Fig. S2.** (a) The asymmetric unit of **iHOF-18**. Symmetry codes: #:  $-1-x, y, 1/2-z$ . (b) The 1D hydrogen bond network of **iHOF-18**.

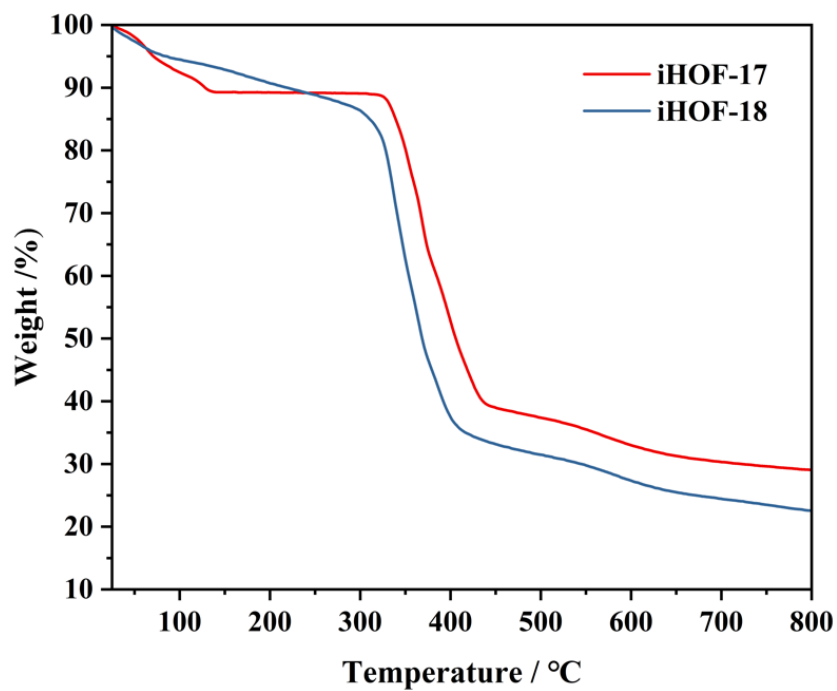

Fig. S3. TGA plot of iHOF-17 and iHOF-18.

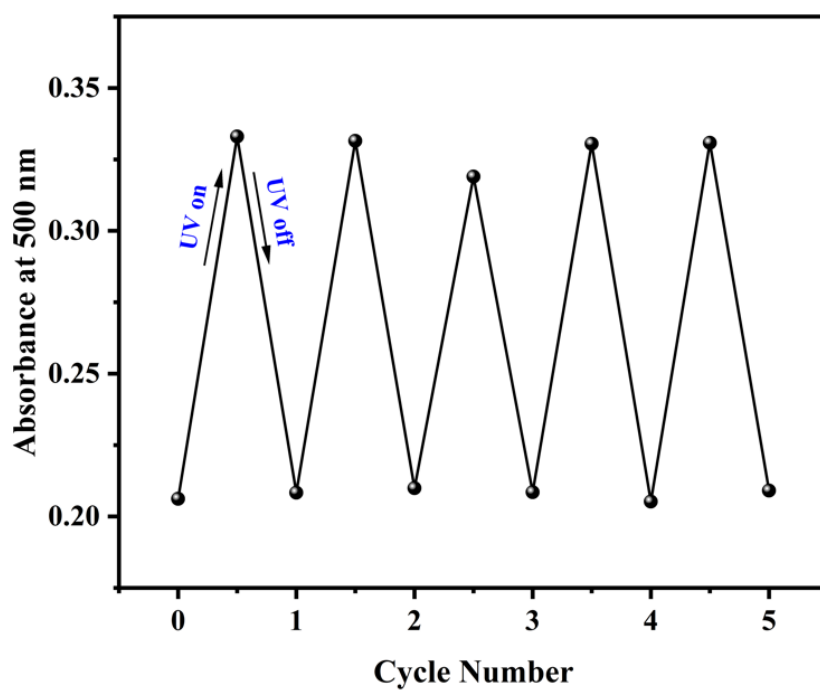

Fig. S4. Fatigue resistance of original powder of iHOF-18 upon irradiation with 365 nm UV light (5 s) and standing under room light (2 min).

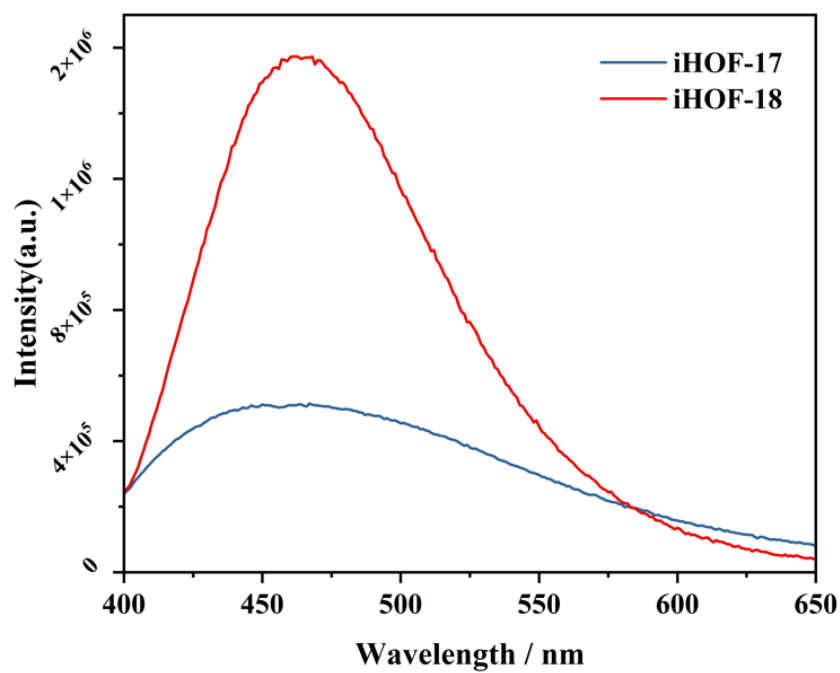

Fig. S5. Fluorescence emission spectra of **iHOF-17** and **iHOF-18**.

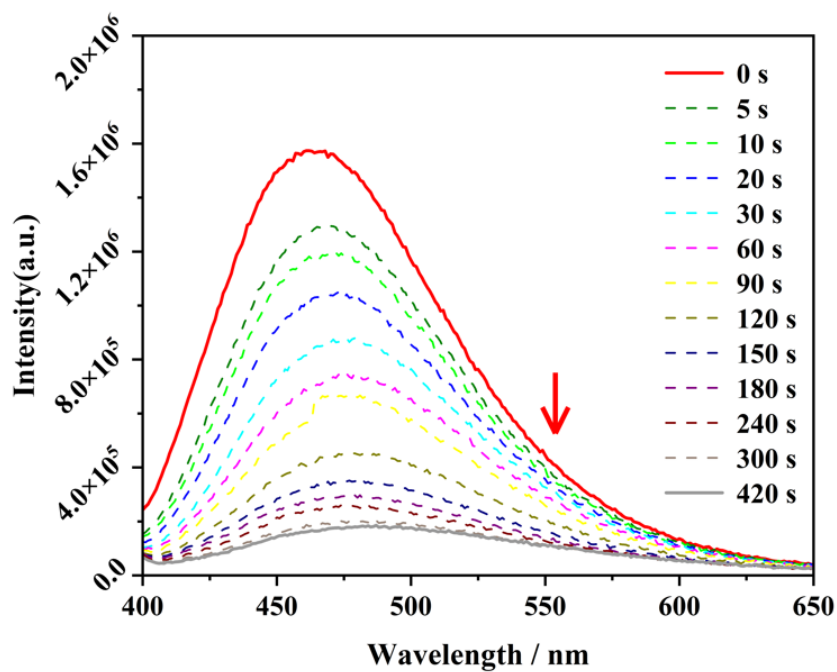

Fig. S6. Time-dependent photoluminescence spectra of **iHOF-18** before and after irradiation.

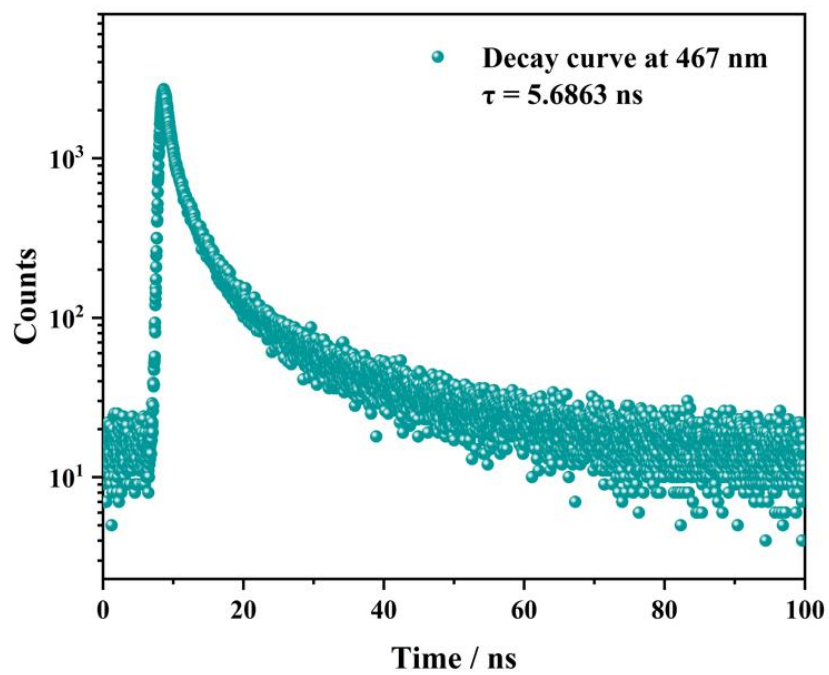

**Fig. S7.** FL lifetime decay curve of **iHOF-17** at 467 nm.

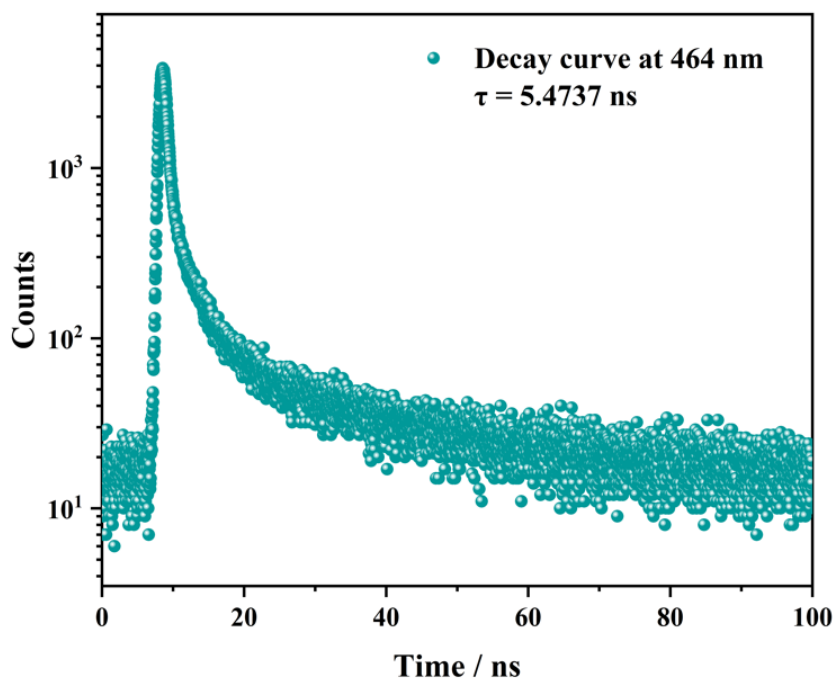

**Fig. S8.** FL lifetime decay curve of **iHOF-18** at 464 nm.



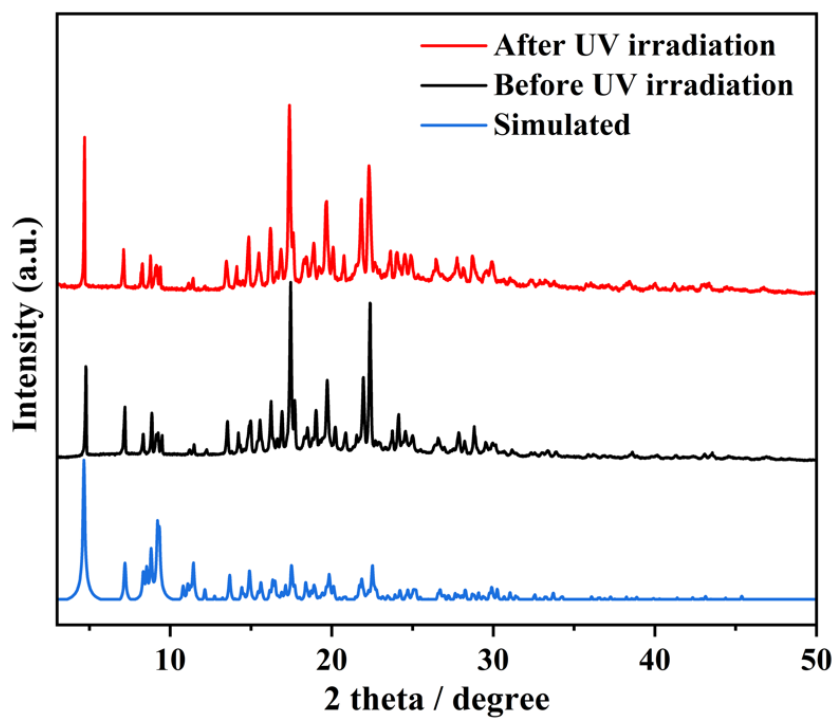

**Fig. S9.** PXRD patterns of **iHOF-18** before and after UV irradiation.

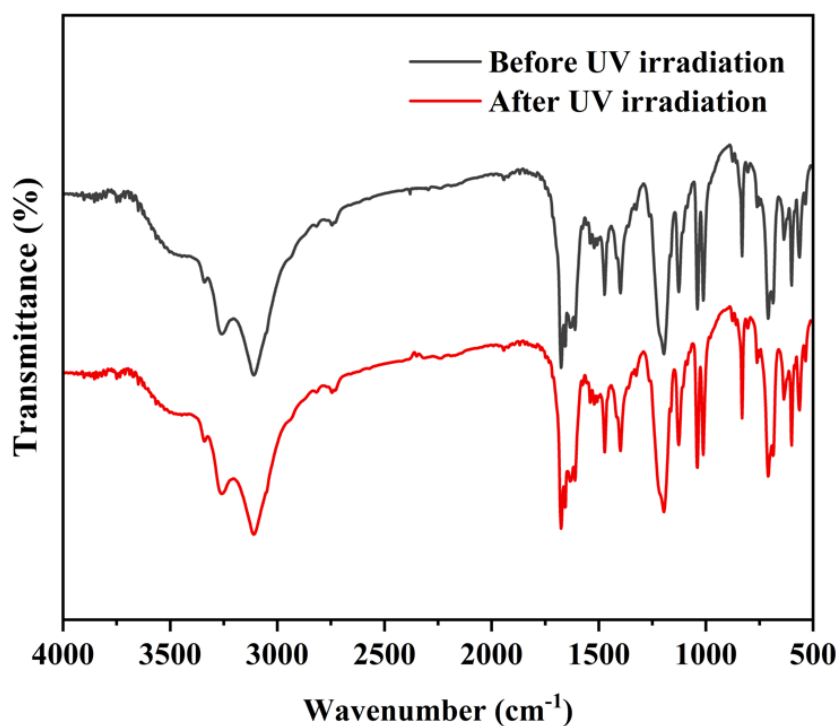

**Fig. S10.** IR spectra of **iHOF-18** before and after UV irradiation.

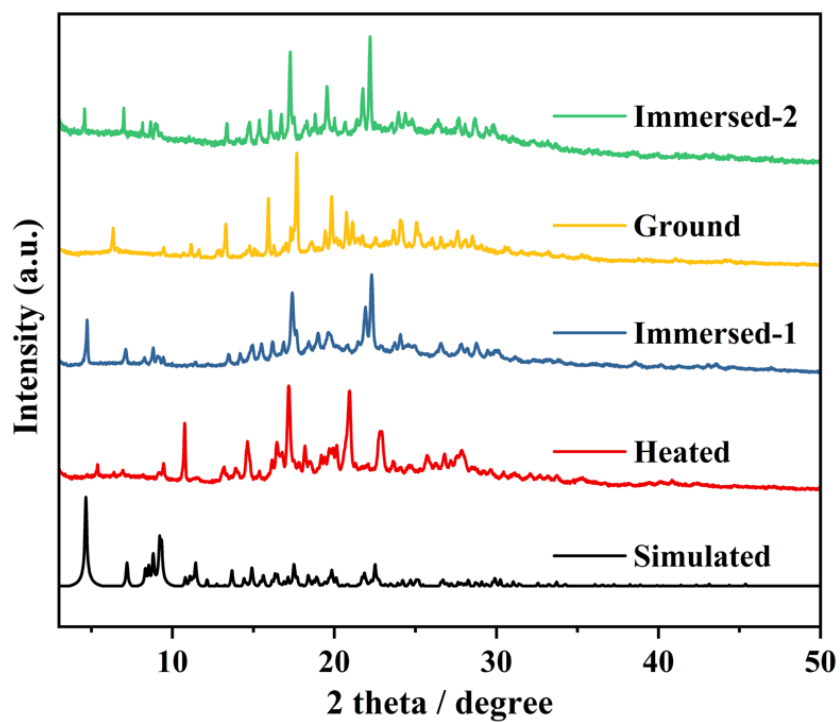

**Fig. S11.** PXRD patterns of **iHOF-18** in different aggregation states. Immersed-1: Heated and then immersed, Immersed-2: Ground and then immersed.

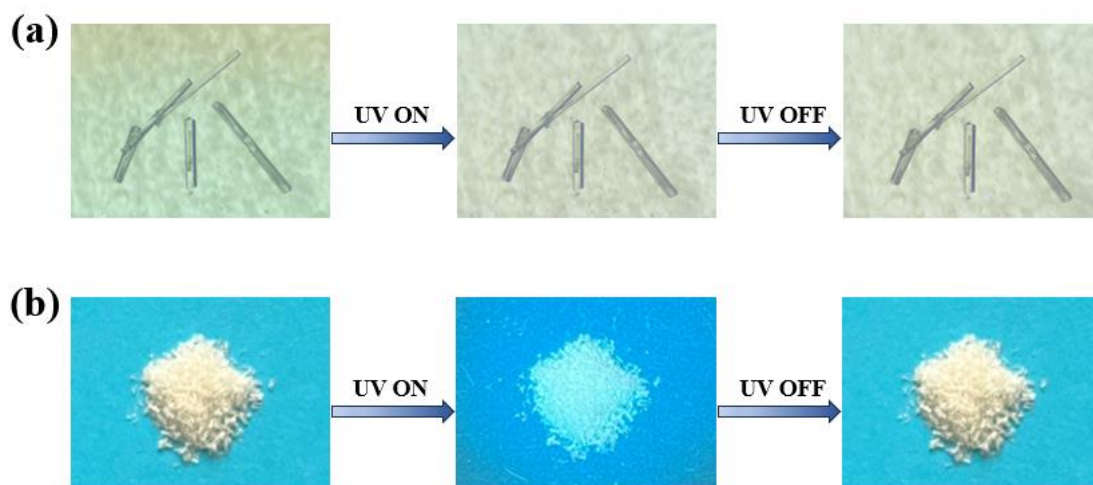

**Fig. S12.** Images of (a) single crystal and (b) powder of **iHOF-17** without discoloration before and after UV irradiation.

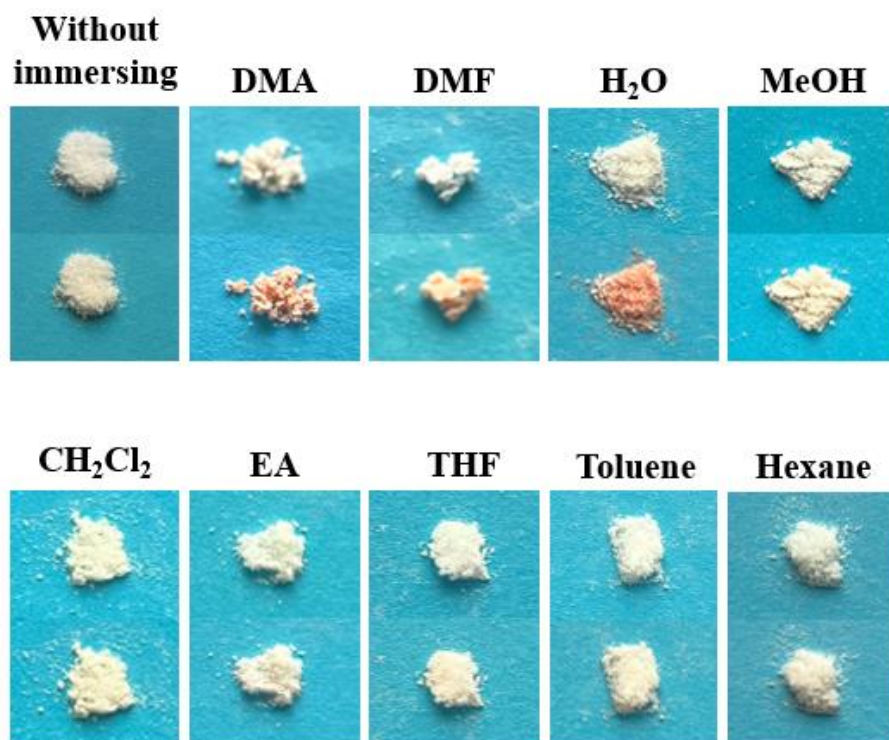

**Fig. S13.** Solvent-selectivity of iHOF-18.

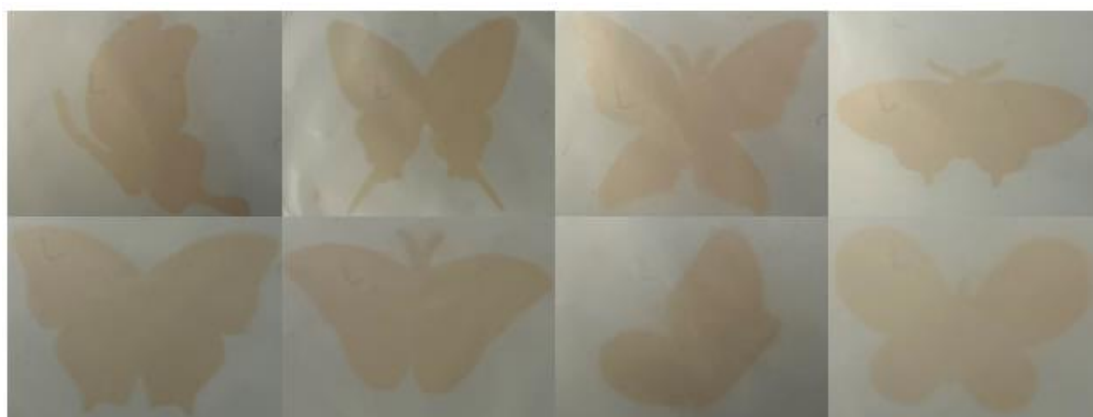

**Fig. S14.** Printing different patterns on 10%-iHOF-18-PVA composite membrane.

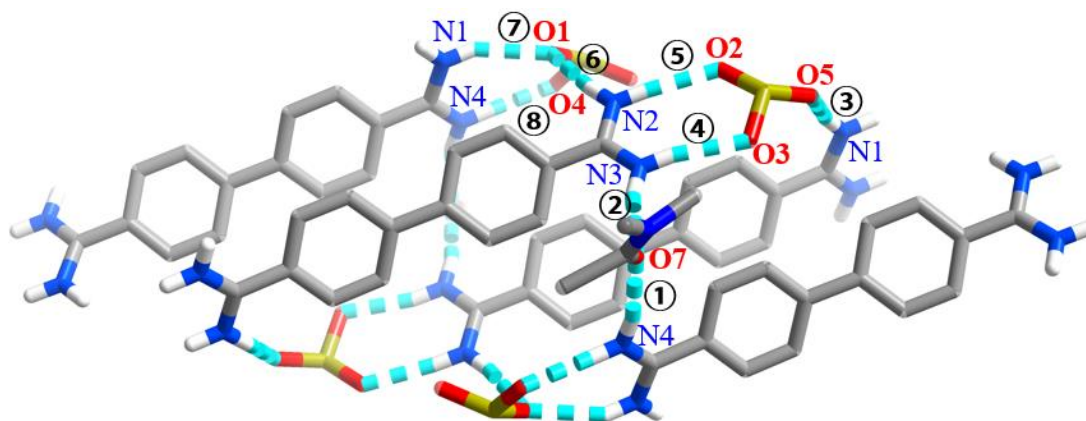

① = 2.8057Å ② = 2.8491Å ③ = 2.8265Å ④ = 2.8331Å  
⑤ = 2.8521Å ⑥ = 2.9364Å ⑦ = 2.8534Å ⑧ = 2.8164Å

**Fig. S15.** Possible electron transfer pathways by hydrogen bonding of iHOF-18.

## Supporting Tables

**Table S1.** Crystal structure data and refinement details of **iHOF-17** and **iHOF-18**.

| Compounds                                                                       | iHOF-17                                                                       | iHOF-18                                                                        |
|---------------------------------------------------------------------------------|-------------------------------------------------------------------------------|--------------------------------------------------------------------------------|
| Empirical formula                                                               | C <sub>42</sub> H <sub>48</sub> N <sub>8</sub> O <sub>16</sub> S <sub>4</sub> | C <sub>26</sub> H <sub>66</sub> N <sub>10</sub> O <sub>14</sub> S <sub>4</sub> |
| Formula weight                                                                  | 1049.12                                                                       | 1303.49                                                                        |
| Temperature / K                                                                 | 150.0                                                                         | 213.15                                                                         |
| Wavelength / Å                                                                  | 1.54184                                                                       | 1.54184                                                                        |
| Crystal system                                                                  | monoclinic                                                                    | monoclinic                                                                     |
| Space group                                                                     | <i>P2<sub>1</sub>/c</i>                                                       | <i>C2/c</i>                                                                    |
| <i>a</i> /Å                                                                     | 12.9205(2)                                                                    | 37.9540(19)                                                                    |
| <i>b</i> /Å                                                                     | 27.6064(4)                                                                    | 10.7480(8)                                                                     |
| <i>c</i> /Å                                                                     | 15.3072(2)                                                                    | 24.5839(8)                                                                     |
| $\alpha$ /°                                                                     | 90.00                                                                         | 90.00                                                                          |
| $\beta$ /°                                                                      | 113.7185(7)                                                                   | 93.542(4)                                                                      |
| $\gamma$ /°                                                                     | 90.00                                                                         | 90.00                                                                          |
| Volume/Å <sup>3</sup>                                                           | 4998.72(13)                                                                   | 10009.4(9)                                                                     |
| <i>Z</i>                                                                        | 4                                                                             | 4                                                                              |
| $\rho_{\text{calc}}$ / cm <sup>3</sup>                                          | 1.394                                                                         | 0.865                                                                          |
| $\mu$ / mm <sup>-1</sup>                                                        | 2.395                                                                         | 1.258                                                                          |
| F(000)                                                                          | 2192.0                                                                        | 2736.0                                                                         |
| Reflections collected                                                           | 51845                                                                         | 31509                                                                          |
| Independent reflections                                                         | 8696                                                                          | 8619                                                                           |
| Data/restraints/parameters                                                      | 8696/24/643                                                                   | 8619/6/409                                                                     |
| Goodness-of-fit on F <sup>2</sup>                                               | 1.081                                                                         | 1.031                                                                          |
| <sup>a</sup> R <sub>1</sub> , <sup>b</sup> wR <sub>2</sub> [I > 2 $\sigma$ (I)] | 0.0895/0.2377                                                                 | 0.0751/0.2137                                                                  |
| <sup>a</sup> R <sub>1</sub> , <sup>b</sup> wR <sub>2</sub> (all data)           | 0.0933/0.2409                                                                 | 0.1026/0.2297                                                                  |
| Largest diff. peak/hole / e.Å <sup>-3</sup>                                     | 2.23/-1.31                                                                    | 0.47/-0.36                                                                     |

$${}^aR1 = \sum ||F_o| - |F_c|| / \sum |F_o|. \quad {}^b wR2 = \{ \sum [w(F_o^2 - F_c^2)^2] / \sum [w(F_o^2)^2] \}^{1/2}$$

**Table S2.** Detailed data of **iHOF-17** hydrogen bond long bond angle.

| X-H...Y        | X...Y / Å | H...Y / Å | ∠XHY / ° |
|----------------|-----------|-----------|----------|
| N1-H1A...O3    | 2.8314    | 1.965     | 167.411  |
| N2-H2A...O2    | 2.9279    | 2.188     | 141.302  |
| N3-H3A...O14   | 2.9444    | 2.082     | 166.501  |
| N3-H3B...O13   | 2.8925    | 2.039     | 163.700  |
| N4-H4A...O16   | 2.8790    | 2.012     | 168.248  |
| N4-H4B...O3    | 2.9553    | 2.273     | 134.422  |
| N5-H5A...O6    | 2.8662    | 2.041     | 155.824  |
| N5-H5B...O12   | 2.9383    | 2.062     | 174.435  |
| N6-H6A...O4    | 2.8853    | 2.019     | 167.348  |
| N6-H6B...O16   | 2.9620    | 2.259     | 136.855  |
| N7-H7A...O5    | 2.9399    | 2.065     | 174.024  |
| N7-H7B...O13   | 2.9008    | 2.103     | 150.586  |
| N8-H8A...O1    | 2.8680    | 2.014     | 163.222  |
| N8-H8B...O8    | 2.8768    | 2.008     | 169.289  |
| O13-H13B...O10 | 2.7619    | 1.971     | 150.679  |
| O14-H14B...O11 | 2.6600    | 2.078     | 123.523  |
| O15-H15A...O5  | 2.7872    | 2.238     | 120.967  |
| O16-H16A...O14 | 2.6918    | 1.825     | 173.601  |

**Table S3.** Detailed data of **iHOF-18** hydrogen bond long bond angle.

| X-H $\cdots$ Y     | X $\cdots$ Y / Å | H $\cdots$ Y / Å | $\angle$ XHY / ° | Potential electron acceptor |
|--------------------|------------------|------------------|------------------|-----------------------------|
| N1-H1B $\cdots$ O5 | 2.8265           | 2.017            | 154.499          | N1 <sup>+</sup>             |
| N1-H1A $\cdots$ O1 | 2.8534           | 2.048            | 153.448          |                             |
| N2-H2A $\cdots$ O2 | 2.8521           | 1.984            | 174.890          | N2 <sup>+</sup>             |
| N2-H2B $\cdots$ O1 | 2.9364           | 2.097            | 162.088          |                             |
| N3-H3B $\cdots$ O7 | 2.8491           | 2.005            | 163.105          | N3 <sup>+</sup>             |
| N3-H3A $\cdots$ O3 | 2.8331           | 1.974            | 169.404          |                             |
| N4-H4B $\cdots$ O7 | 2.8057           | 1.959            | 164.003          | N4 <sup>+</sup>             |
| N4-H4A $\cdots$ O4 | 2.8164           | 1.964            | 166.087          |                             |

**Table S4.** List of representative HOF-based photochromic crystal materials.

| Crystalline materials                                                                    | Photoresponsive time | mechanism of photochromism | References       |
|------------------------------------------------------------------------------------------|----------------------|----------------------------|------------------|
| <b>iHOF-18</b>                                                                           | <b>1 s</b>           | <b>free radical</b>        | <b>This work</b> |
| [H <sub>2</sub> (bpyb)](H <sub>2</sub> PO <sub>4</sub> ) <sub>2</sub> ·2H <sub>2</sub> O | 1 s                  | free radical               | 6                |
| PFC-26                                                                                   | 2 s                  | free radical               | 7                |
| (H <sub>2</sub> CV)(H <sub>2</sub> BTEC)                                                 | 3 s                  | free radical               | 8                |
| [(H <sub>2</sub> L) (2,7-NDS)·5H <sub>2</sub> O]                                         | 30 s                 | free radical               | 9                |
| SP2 ⊂ HOF2                                                                               | 60 s                 | isomerization              | 10               |
| ECUT-HOF-30                                                                              | 180 s                | free radical               | 11               |
| HOF A                                                                                    | 300 s                | free radical               | 12               |



## Supplementary Reference.

1. O. V. Dolomanov, L. J. Bourhis, R.J. Gildea, J. A. K. Howard, H. Puschmann, *J. Appl. Cryst.* 2009, **42**, 339-341.
2. G.M. Sheldrick, *Acta Cryst.*, 2015, **A71**, 3-8.
3. G.M. Sheldrick, *Acta Cryst.*, 2015, **C71**, 3-8.
4. A. L. Spek, *J. Appl. Cryst.* 2003, **36**, 7–13.
5. Y. Ooyama, M. Sugino, T. Enoki, K. Yamamoto, N. Tsunoji and J. Ohshita, *New J. Chem.*, 2017, **41**, 4747-4749.
6. T. Chen, H.-B. Jiang, K.-B. Jiang, D.-L. Hu, L.-Z. Cai, M.-S. Wang and G.-C. Guo, *ACS Appl. Mater. Interfaces*, 2022, **14**, 11619-11625.
7. M. Khanpour, W. Z. Deng, Z. B. Fang, Y. L. Li, Q. Yin, A. A. Zhang, F. Rouhani, A. Morsali and T. F. Liu, *Chem. – Eur. J.*, 2021, **27**, 10957-10965.
8. S.-L. Li, Y. Shen, W. Yang, Y.-J. Wang, Z. Qi, J. Zhang and X.-M. Zhang, *Chinese J. Chem.*, 2021, **40**, 351-356.
9. S. Chen, Y. Ju, H. Zhang, Y. Zou, S. Lin, Y. Li, S. Wang, E. Ma, W. Deng, S. Xiang, B. Chen and Z. Zhang, *Angew. Chem., Int. Ed.*, 2023, **62**, e202308418.
10. Z. He, Y. Li, H. Wu, Y. Yang, Y. Chen, J. Zhu, Q. Li and G. Jiang, *ACS Appl. Mater. Interfaces*, 2022, **14**, 48133-48142.
11. L. Wang, L. Yang, L. Gong, R. Krishna, Z. Gao, Y. Tao, W. Yin, Z. Xu and F. Luo, *Chem. Eng. J.*, 2020, **383**, 123117.
12. A. R. Y. Almuhana, G. R. F. Orton, C. Rosenberg and N. R. Champness, *Chem. Commun.*, 2024, **60**, 452-455.
